# Supplementary material
Source: publisher site journal article supplement (https://www.dovepress.com/article/562258)
Supplement: Supplementary file 1 [file 562258%20Revised%20%252509Supplementary%20-%20Questionnaire.docx]

**Part 1: General information**

1. What is your subspecialty? (Check all that apply)
   - General ophthalmology
   - Cornea and refractive surgery
   - Uveitis
   - Glaucoma
   - Retina and vitreous
   - Neuro-ophthalmology
   - Ocular oncology
   - Oculoplastics
   - Pediatrics and strabismus
   - Low vision and visual rehabilitation
   - Other (Please indicate) _____________
2. In which province of Thailand do you primarily work?

____________________________________________

1. What type of hospital do you primarily work?

- Tertiary hospital
- Secondary hospital
- Primary hospital
- University hospital
- Private hospital
- Private clinic
  - Mobile surgical service
- Other (Please indicate) _____________

1. How many years have you been practicing as an ophthalmologist?

- Less than 5 years
- 5-10 years
- 11-20 years
- 21-30 years
- More than 30 years

1. How many cataract surgeries do you perform per month on average?

- 1-2 cases
- 3-5 cases
- 6-10 cases
- 11-20 cases
- More than 20 cases

1. What technique do you primarily perform for cataract surgery?
   - Phacoemulsification
   - Extracapsular Cataract Extraction
   - Manual Small Incision Cataract Surgery
   - Other (Please indicate) _____________
2. What type of anesthesia do you primarily use for cataract surgery?

- Topical anesthesia
- Peribulbar anesthesia
- Retrobulbar anesthesia
- General anesthesia

**Part 2: Preoperative phase (for uncomplicated surgery)**

1. Do you prescribe preoperative topical antibiotics as home medication?

- Yes
- No (Skip to question No.2)
  1. Which topical antibiotics do you primarily prescribe?
- Neomycin sulphate, polymyxin B sulphate, and gramicidin eye drops (PolyOph)
- Tobramycin ophthalmic solution (Tobrex®)
- Levofloxacin ophthalmic solution (Cravit®)
- Moxifloxacin ophthalmic solution (Vigamox®)
- Other (Please indicate) _____________
  1. What is the recommended ideal time for preoperative topical antibiotic prophylaxis?
- 1-3 days before the surgery
- 4-7 days before the surgery
- More than 7 days before the surgery

1. Do you prescribe preoperative oral antibiotics?

- Yes
- No (Skip to question No.3)
  1. Which oral antibiotic do you primarily prescribe?
- Penicillins such as dicloxacillin, amoxicillin, amoxicillin/clavulanic acid
- Cephalosporins such as cephalexin, cefaclor, cefuroxime, cefdinir
- Fluoroquinolones such as levofloxacin, moxifloxacin
- Other (Please indicate) _____________

1. Do you perform lash trimming before cataract surgery?

- Yes
- No

1. Do you recommend face washing before cataract surgery?

- Yes
- No (Skip to question No.5)
  1. If yes, with which cleansing agent?
- Regular soap
- Chlorhexidine scrub
- Povidone-iodine scrub

1. Which antiseptic agent do you apply to surgical field for skin preparation?

- 5% povidone-iodine
- 10% povidone-iodine
- Chlorhexidine gluconate

1. Do you perform eyelid scrubbing?

- Yes
- No

1. How long do you leave antiseptic agent on skin before wiping out?

- Spontaneous removal
- 1 minute
- 2 minutes
- 3 minutes
- Other (Please indicate) _____________

1. Do you administer antiseptic drops to conjunctival fornix before cataract surgery?

- Yes
- No (Skip to question No.9)
  1. Which antiseptic agent do you primarily use?
  - 5% povidone-iodine
  - 10% povidone-iodine
  - Other (Please indicate) _____________
  1. How long do you leave antiseptic agent on conjunctival fornix prior to the surgery?
  - 1 minute
  - 2 minutes
  - 3 minutes
  - Other (Please indicate) _____________

1. Do you irrigate the eye with povidone-iodine solution?

- Yes
- No (Skip to question No.10)
  1. What is the method you adopt for eye irrigation?
  - Solely irrigate with diluted povidone-iodine solution
  - Irrigate with diluted povidone-iodine solution, followed by normal saline solution
  - Irrigate with diluted povidone-iodine solution, followed by a combination of normal saline solution and antibiotics
  - Other (Please indicate) _____________

1. Do you administer topical antibiotics at the operation room prior to surgery?

- Yes
- No (Skip to the next section)
  1. Which topical antibiotic do you primarily use?
- Neomycin sulphate, polymyxin B sulphate, and gramicidin eye drops (PolyOph)
- Tobramycin ophthalmic solution (Tobrex®)
- Levofloxacin ophthalmic solution (Cravit®)
- Moxifloxacin ophthalmic solution (Vigamox®)
- Other (Please indicate) _____________

**Part 3: Intraoperative phase (for uncomplicated surgery)**

1. Do you apply phacoemulsification technique?

- Yes
- No (Skip to question No.2)
  1. Which incision do you primarily make?
- Clear corneal incision
- Scleral tunnel
- Other (Please indicate) _____________
  1. What size of the incision do you primarily make?
- ≤ 2.4 mm
- 2.75 mm
- 3.0 mm
- ≥ 3.0 mm
  1. Do you regularly suture main port incision?
- Yes
- No

1. Do you administer intracameral antibiotics?

- Yes
- No (Skip to question No.3)
  1. Which intracameral antibiotic do you primarily use?
- Intracameral cefuroxime (eg. Zinacef™, Aprokam®)
- Intracameral moxifloxacin (eg. Vigamox®)
- Intracameral levofloxacin (eg. Cravit®)
- Intracameral vancomycin
- Other (Please indicate) _____________

1. Do you administer subconjunctival antibiotics?

- Yes
- No (Skip to question No.4)
  1. Which subconjunctival antibiotic do you primarily use?
- Subconjunctival cefuroxime (eg. Zinacef™, Aprokam®)
- Subconjunctival gentamicin
- Subconjunctival vancomycin

1. Do you administer subconjunctival steroids?

- Yes
- No

1. Do you administer topical antibiotics immediately after the surgery?

- Yes
- No (Skip to question No.6)
  1. Which topical antibiotic do you primarily use?
- Neomycin sulphate, polymyxin B sulphate, and gramicidin eye drops (PolyOph)
- Neomycin sulphate and dexamethasone eye drops (DexOph)
- Tobramycin ophthalmic solution (Tobrex®)
- Tobramycin and dexamethasone ophthalmic suspension (TobraDex®)
- Moxifloxacin ophthalmic solution (Vigamox®)
- Moxifloxacin and dexamethasone ophthalmic solution (Vigadexa®)
- Levofloxacin ophthalmic solution (Cravit®)
- Other (Please indicate) _____________

1. Do you administer ophthalmic ointments immediately after the surgery?

- Yes
- No (Skip to question 7)
  1. Which ophthalmic ointment do you primarily use?
- Chloramphenical ophthalmic ointment
- Oxytetracycline hydrochloride and polymyxin B sulphate ophthalmic ointment (Terramycin™)
- Neomycin sulphate, polymyxin B sulphate, and dexamethasone ophthalmic ointment (Maxitrol®)
- Tobramycin and sexamethasone ophthalmic ointment (TobraDex®)
- Other (Please indicate) _____________

1. Do you cover the eye with eye pads following surgery?

- Yes
- No (cover with only eye shields)

**Part 4: Postoperative phase (for uncomplicated surgery)**

1. Do you prescribe post-operative topical antibiotics as home medication?

- Yes
- No (Skip to question No.2)
  1. Which topical antibiotic do you primarily prescribe?
- Neomycin sulphate, polymyxin B sulphate, and gramicidin eye drops (PolyOph)
- Neomycin sulphate and dexamethasone eye drops (DexOph)
- Tobramycin ophthalmic solution (Tobrex®)
- Tobramycin and dexamethasone ophthalmic suspension (TobraDex®)
- Moxifloxacin ophthalmic solution (Vigamox®)
- Moxifloxacin and dexamethasone ophthalmic solution (Vigadexa®)
- Levofloxacin ophthalmic solution (Cravit®)
- Other (Please indicate) _____________
  1. How long do patients need to use post-operative topical antibiotics?
- Less than 7 days
- 7 days
- 14 days
- Use until the bottle is completely empty
- Other (Please indicate) _____________

1. Do you prescribe post-operative oral antibiotics as home medication?

- Yes
- No (Skip to question No.3)
  1. Which oral antibiotic do you primarily prescribe?
- Penicillins such as dicloxacillin, amoxicillin, amoxicillin/clavulanic acid
- Cephalosporins such as cephalexin, cefaclor, cefuroxime, cefdinir
- Fluoroquinolones such as levofloxacin, moxifloxacin
- Other (Please indicate) _____________
  1. How long do patients need to use post-operative oral antibiotics?
- 3 days
- 5 days
- 7 days
- Other (Please indicate) _____________

1. What is the waiting period you recommend to the patients to resume washing their face and hair after the surgery?

- Face wash and hair cleansing are not prohibited
- Less than 7 days
- 7-14 days
- 15-30 days
- More than 30 days
- Other (Please indicate) _____________

1. For how many days do you advise patients to use an eye shield at night after the surgery?

- Eye shields are not required
- Less than 7 days
- 7-14 days
- 15-30 days
- More than 30 days
- Other (Please indicate) _____________
